# Supplementary material
Source: PubMed Central journal article supplement (PMC4070168)
Supplement: mmc1.pdf [file mmc1.pdf]

## Supporting Material

### Effect of oxidation on the structure of human low and high density human lipoproteins

Cristiano L. P. Oliveira, Priscila R. Santos, Andrea M. Monteiro and Antonio M. Figueiredo Neto

Instituto de Física, Universidade de São Paulo, São Paulo, Brazil

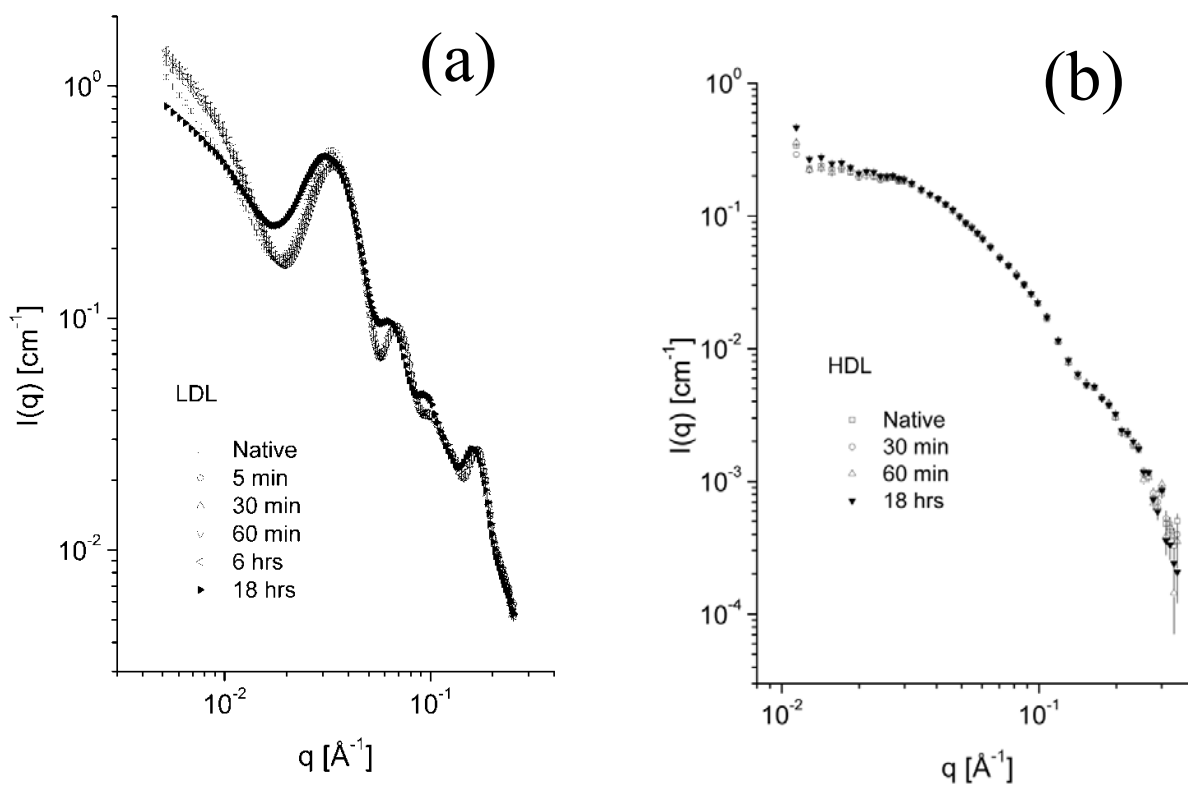

Figure S1: Experimental SAXS data for the studied lipoproteins. a) LDL scattering intensity data. b) HDL scattering intensity data.

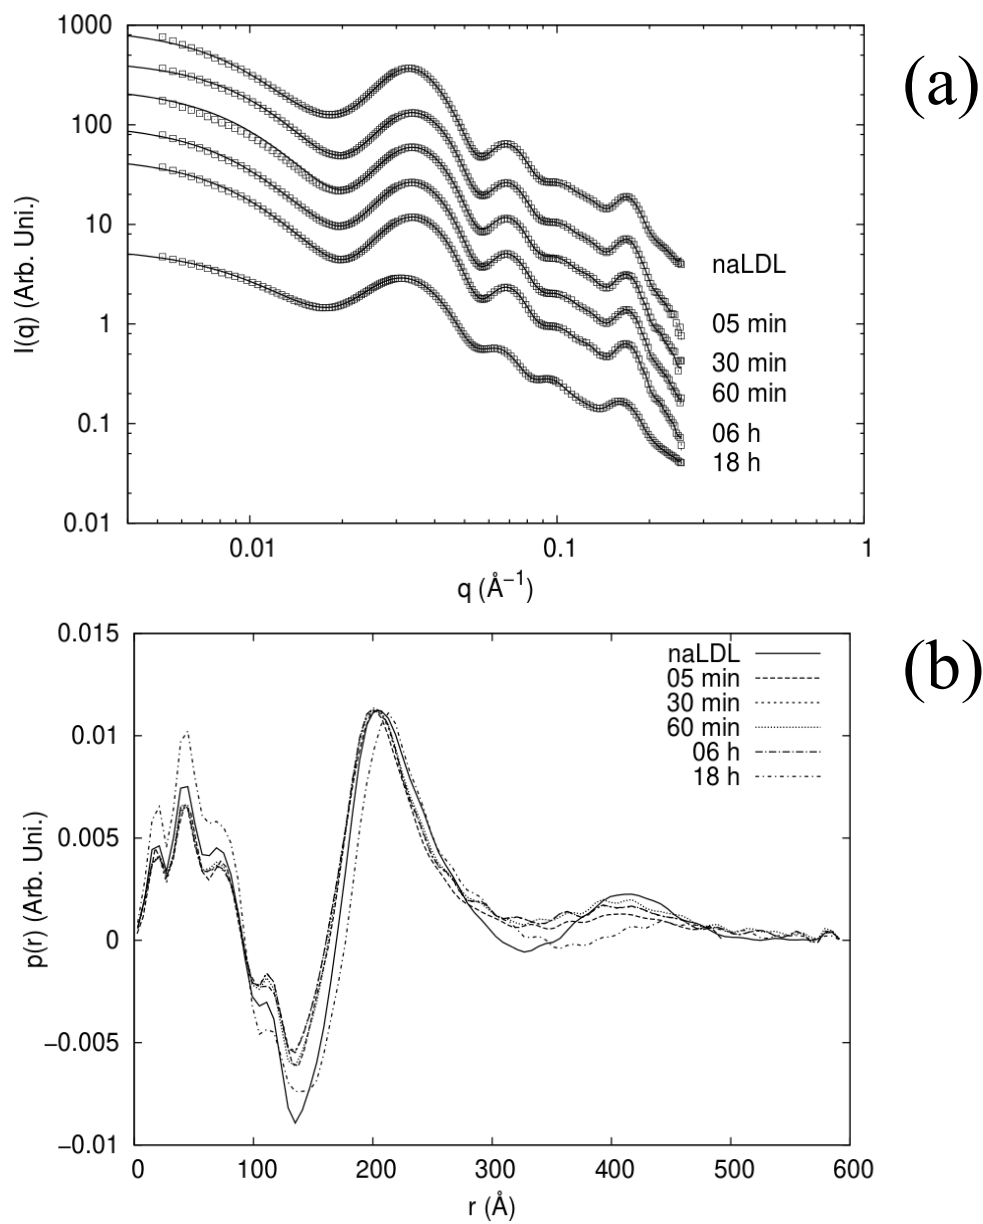

Figure S2: Indirect Fourier Transformation analysis for SAXS data from LDL samples. a) LDL scattering intensity data fitted with IFT method. Experimental data (open squares) and model fit (solid lines). b) LDL pair distances distribution function curves,  $p(r)$ , obtained by the IFT method.

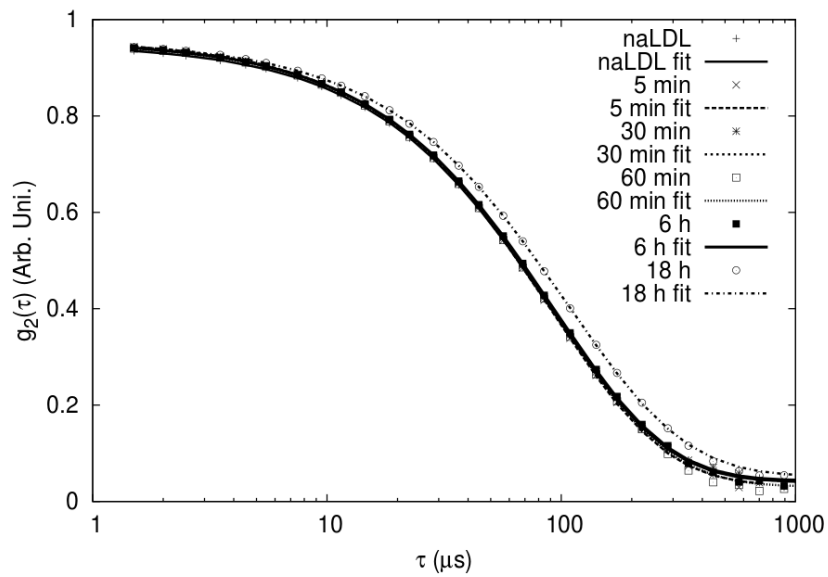

(a)

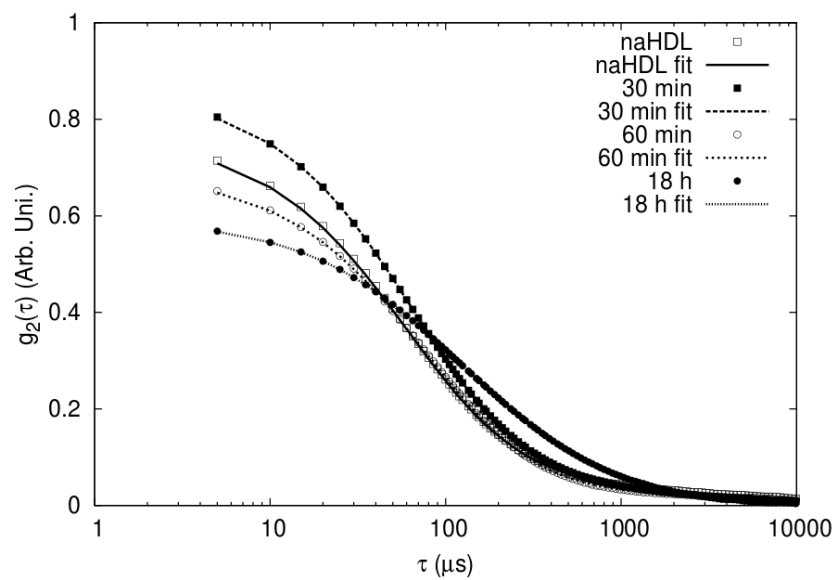

(b)

Figure S3: DLS results for LDL and HDL samples. a) DLS experimental autocorrelation curves and respectively fits for native and oxidized LDL samples. b) DLS experimental autocorrelation curves and respectively fits of native and oxidized HDL samples.
